# Supplementary material for: 3D printed rodent skin-skull-brain model: A novel animal-free approach for neurosurgical training
Source: PLoS One. 2021 Jun 23;16(6):e0253477. doi: 10.1371/journal.pone.0253477 (PMC8221494; doi:10.1371/journal.pone.0253477)
Supplement: S1 Raw data — (XLSX) [file pone.0253477.s001.xlsx]

## Sheet: Feuil1
Raw data Fig 4: Surgeons assessment of model fidelity
Q1	Q2	Q3	Q4
5	5	3	4
4	5	5	5
5	5	4	4
4	5	5	4
5	5	4	5
4	5	4	5
5	5	4	4
4	5	5	4
4	5	5	4
5	5	3	5
